# Supplementary material for: The Arabidopsis MIK2 receptor elicits immunity by sensing a conserved signature from phytocytokines and microbes
Source: PubMed Central journal article supplement (PMC8448819; doi:10.1038/s41467-021-25580-w), 2021-09-17
Supplement: 41467_2021_25580_MOESM3_ESM.pdf [file 41467_2021_25580_MOESM3_ESM.pdf]

## **Description of Additional Supplementary Files**

### **Supplementary Data 1: Description**

Secreted peptide genes upregulated by PIP1 in RLK7-MIK2 transgenic plants.

### **Supplementary Data 2: Description**

SCOOP12-regulated genes in WT and mik2-1, and PIP1-regulated genes in WT and RLK7-MIK2 transgenic plants.

### **Supplementary Data 3: Description**

Primers used in this study.

### **Supplementary Data 4: Description**

Peptides used in this study.
